# Supplementary material
Source: publisher site journal article supplement (https://www.dovepress.com/article/257809)
Supplement: Supplementary file 1 [file get_supplementary_file.php]

Table S1. Factors contribution to executive functional performance differences based on race/ethnicity, age, and sex

|                        | Model 1           |                  | Model 2           |                  | Model 3           |                  | Model 4           |                  | Model 5           |                  |
|------------------------|-------------------|------------------|-------------------|------------------|-------------------|------------------|-------------------|------------------|-------------------|------------------|
| Intercept              | <b>10.64±0.70</b> | <b>&lt;0.001</b> | <b>7.82±0.83</b>  | <b>&lt;0.001</b> | <b>5.70±1.19</b>  | <b>&lt;0.001</b> | <b>11.16±0.74</b> | <b>&lt;0.001</b> | <b>4.34±1.27</b>  | <b>&lt;0.001</b> |
| Whites                 | 0                 |                  | 0                 |                  | 0                 |                  | 0                 |                  | 0                 |                  |
| Blacks                 | <b>-1.96±0.49</b> | <b>&lt;0.001</b> | <b>-1.51±0.48</b> | <b>0.002</b>     | <b>-1.14±0.50</b> | <b>0.024</b>     | <b>-1.92±0.48</b> | <b>&lt;0.001</b> | -0.84±0.49        | 0.084            |
| Hispanics              | <b>-2.30±0.39</b> | <b>&lt;0.001</b> | <b>-1.37±0.41</b> | <b>0.001</b>     | <b>-2.04±0.38</b> | <b>&lt;0.001</b> | <b>-2.32±0.40</b> | <b>&lt;0.001</b> | <b>-1.55±0.40</b> | <b>&lt;0.001</b> |
| Age < 67               | 0                 |                  | 0                 |                  | 0                 |                  | 0                 |                  | 0                 |                  |
| Age 67-74              | -0.55±0.41        | 0.187            | -0.57±0.40        | 0.156            | -0.33±0.40        | 0.406            | -0.63±0.42        | 0.132            | -0.53±0.39        | 0.169            |
| Age ≥74                | <b>-1.09±0.41</b> | <b>0.009</b>     | <b>-1.03±0.40</b> | <b>0.011</b>     | -0.16±0.44        | 0.707            | <b>-1.33±0.42</b> | <b>0.002</b>     | -0.58±0.43        | 0.181            |
| Sex                    | 0.55±0.39         | 0.158            | 0.68±0.37         | 0.071            | 0.71±0.38         | 0.059            | 0.51±0.38         | 0.185            | <b>0.73±0.37</b>  | <b>0.047</b>     |
| Low SES                | -                 |                  | <b>0</b>          |                  | -                 |                  | -                 |                  | <b>0</b>          |                  |
| Medium SES             | -                 |                  | <b>2.17±0.46</b>  | <b>&lt;0.001</b> | -                 |                  | -                 |                  | <b>1.79±0.49</b>  | <b>&lt;0.001</b> |
| High SES               | -                 |                  | <b>3.15±0.53</b>  | <b>&lt;0.001</b> | -                 |                  | -                 |                  | <b>2.59±0.55</b>  | <b>&lt;0.001</b> |
| Physical functionality | -                 |                  | -                 |                  | <b>0.35±0.07</b>  | <b>&lt;0.001</b> | -                 |                  | <b>0.29±0.07</b>  | <b>&lt;0.001</b> |
| Depression             | -                 |                  | -                 |                  | -                 |                  | -0.06±0.04        | 0.219            | 0.01±0.04         | 0.788            |
| R <sup>2</sup>         | 0.123             |                  | 0.219             |                  | 0.195             |                  | 0.150             |                  | 0.279             |                  |

Notes: significant relationships are highlighted. All models are adjusted for race and ethnicity, age, and gender.

Table S2. Baron and Kenny mediation analysis (outcome: executive function)

| Racial/ethnic and age differences in executive function |                                   | C path effect          | A path effect | B path effect | C' path effect | Indirect (ab) effect (95% CI) | ab/c <sup>§</sup>    |         |
|---------------------------------------------------------|-----------------------------------|------------------------|---------------|---------------|----------------|-------------------------------|----------------------|---------|
| Racial differences                                      | SES influences                    | Hispanic vs White      | -2.28±0.39*** | -0.64±0.08*** | -              | -1.36±0.41**                  | -0.92 (-1.31; -0.53) | 0.40*** |
|                                                         |                                   | Black vs White         | -1.89±0.49*** | -0.30±0.11**  | -              | -1.36±0.48**                  | -0.53 (-0.88; -0.18) | 0.28*   |
|                                                         |                                   | SES                    | -             | -             | 1.48±0.26***   | -                             | -                    | -       |
|                                                         | Physical functionality influences | Hispanic vs White      | -2.28±0.39*** | -0.48±0.33    | -              | -<br>2.08±0.38**<br>*         | -0.20 (-0.42; 0.02)  | 0.09    |
|                                                         |                                   | Black vs White         | -1.89±0.49*** | -2.31±0.41*** | -              | -1.17±0.49*                   | -0.72 (-1.13; -0.31) | 0.38*** |
|                                                         |                                   | Physical functionality | -             | -             | 0.32±0.07***   | -                             | -                    | -       |
| Age differences                                         | Physical functionality influences | Age 67-74 vs <64       | -0.58±0.41    | -0.82±0.37*   | -              | -0.33±0.39                    | -0.25 (-0.52; 0.02)  | 0.43    |
|                                                         |                                   | Age ≥74 vs Age < 64    | -1.13±0.41**  | -2.67±0.38*** | -              | -0.16±0.44                    | -0.97 (-1.38; -0.56) | 0.86*** |
|                                                         |                                   | Physical functionality | -             | -             | 0.35±0.06***   | -                             | -                    | -       |

Notes: All models are adjusted for race and ethnicity, age, and sex; c path (total effect)=effect of predictor on outcome; a path=effect of predictor on mediator; b path=effect of mediator on outcome controlling for predictor; c' path (direct effect)=effect of predictor on outcome controlling for mediator; ab path (indirect effect)=effect of predictor on outcome through mediator; Significance of the indirect effect was tested with the Sobel test ; 95% confidence intervals not including 0 indicate a significant; § Indirect effect as proportion of total effect; highlighted are factors that explain at least 20% of variance in outcomes (e.g. racial disparities in global cognitive performance).

Table S3. Factors contributing to memory performance differences based on race/ethnicity, age, and sex

|                        | Model 1           |                  | Model 2           |                  | Model 3           |                  | Model 4           |                  | Model 5          |                  |
|------------------------|-------------------|------------------|-------------------|------------------|-------------------|------------------|-------------------|------------------|------------------|------------------|
| Intercept              | <b>1.67±0.40</b>  | <b>&lt;0.001</b> | 0.94±0.49         | 0.060            | -0.79±0.69        | 0.289            | <b>1.67±0.43</b>  | <b>&lt;0.001</b> | -1.10±0.79       | 0.165            |
| Whites                 | 0                 |                  | 0                 |                  | 0                 |                  | 0                 |                  | 0                |                  |
| Blacks                 | <b>-0.86±0.28</b> | <b>0.003</b>     | <b>-0.74±0.29</b> | <b>0.011</b>     | -0.45±0.29        | 0.130            | <b>-0.86±0.28</b> | <b>0.003</b>     | -0.39±0.30       | 0.191            |
| Hispanics              | <b>-0.67±0.23</b> | <b>0.003</b>     | -0.43±0.25        | 0.084            | <b>-0.55±0.22</b> | <b>0.016</b>     | <b>-0.56±0.23</b> | <b>0.019</b>     | -0.40±0.25       | 0.110            |
| Age < 67               | 0                 |                  | 0                 |                  | 0                 |                  | 0                 |                  | 0                |                  |
| Age 67-74              | -0.34±0.24        | 0.160            | -0.35±0.24        | 0.146            | -0.19±0.24        | 0.424            | -0.30±0.25        | 0.217            | -0.24±0.24       | 0.325            |
| Age ≥74                | <b>-0.53±0.24</b> | <b>0.028</b>     | <b>-0.48±0.24</b> | <b>0.048</b>     | -0.02±0.26        | 0.952            | <b>-0.50±0.25</b> | <b>0.043</b>     | -0.01±0.27       | 0.969            |
| Sex                    | <b>0.80±0.22</b>  | <b>&lt;0.001</b> | <b>0.83±0.22</b>  | <b>&lt;0.001</b> | <b>0.84±0.22</b>  | <b>&lt;0.001</b> | <b>0.83±0.23</b>  | <b>&lt;0.001</b> | <b>0.87±0.23</b> | <b>&lt;0.001</b> |
| Low SES                | -                 |                  | <b>0</b>          |                  | -                 |                  | -                 |                  | <b>0</b>         |                  |
| Medium SES             | -                 |                  | <b>0.55±0.28</b>  | <b>0.049</b>     | -                 |                  | -                 |                  | 0.29±0.30        | 0.349            |
| High SES               | -                 |                  | <b>0.79±0.32</b>  | <b>0.015</b>     | -                 |                  | -                 |                  | 0.41±0.35        | 0.236            |
| Physical functionality | -                 |                  | -                 |                  | <b>0.18±0.04</b>  | <b>&lt;0.001</b> | -                 |                  | <b>0.16±0.04</b> | <b>&lt;0.001</b> |
| Depression             | -                 |                  | -                 |                  | -                 |                  | -0.02±0.03        | 0.557            | 0.02±0.03        | 0.557            |
| R <sup>2</sup>         | 0.078             |                  | 0.095             |                  | 0.130             |                  | 0.083             |                  | 0.132            |                  |

Notes: Significant relationships are highlighted. All models are adjusted for race and ethnicity, age, and gender.

Table S4. Baron and Kenny mediation analysis (outcome: memory)

| Racial/ethnic and age differences in memory |                                   |                        | C path (total) effect | A path effect | B path effect | C' path (direct) effect | AB path (indirect) effect | ab/c <sup>§</sup> |
|---------------------------------------------|-----------------------------------|------------------------|-----------------------|---------------|---------------|-------------------------|---------------------------|-------------------|
| Racial differences                          | SES influences                    | Hispanic vs White      | -0.67±0.22**          | -0.64±0.08*** | -             | -0.44±0.25              | -0.23 (-0.45; -0.01)      | 0.34*             |
|                                             |                                   | Black vs White         | -0.82±0.28**          | -0.30±0.11**  | -             | -0.70±0.29*             | -0.12 (-0.26; 0.02)       | 0.15              |
|                                             |                                   | SES                    | -                     | -             | 0.36±0.16*    | -                       | -                         | -                 |
|                                             | Physical functionality influences | Hispanic vs White      | -0.67±0.22**          | -0.48±0.33    | -             | -0.57±0.22*             | -0.10 (-0.22; 0.02)       | 0.15              |
|                                             |                                   | Black vs White         | -0.82±0.28**          | -2.31±0.41*** | -             | -0.47±0.29              | -0.35 (-0.57; -0.13)      | 0.43**            |
|                                             |                                   | Physical functionality | -                     | -             | 0.16±0.04***  | -                       | -                         | -                 |
| Age differences                             | Physical functionality influences | Age 67-74 vs <64       | -0.36±0.24            | -0.82±0.37*   | -             | -0.19±0.23              | -0.17 (-0.31; -0.03)      | 0.47*             |
|                                             |                                   | Age ≥74 vs Age < 64    | -0.56±0.24*           | -2.67±0.37*** | -             | -0.01±0.26              | -0.55 (-0.80; -0.30)      | 0.98***           |
|                                             |                                   | Physical functionality | -                     | -             | 0.18±0.04***  | -                       | -                         | -                 |

Notes: All models are adjusted for race and ethnicity, age, and sex; c path (total effect)=effect of predictor on outcome; a path=effect of predictor on mediator; b path=effect of mediator on outcome controlling for predictor; c' path (direct effect)=effect of predictor on outcome controlling for mediator; ab path (indirect effect)=effect of predictor on outcome through mediator; Significance of the indirect effect was tested with the Sobel test ; 95% confidence intervals not including 0 indicate a significant; § Indirect effect as proportion of total effect; highlighted are factors that explain at least 20% of variance in outcomes (e.g. racial disparities in global cognitive performance).

Table S5. Factors contributing to attention differences based on race/ethnicity, age, and sex

|                        | Model 1           |                  | Model 2           |                  | Model 3           |                  | Model 4           |                  | Model 5           |                  |
|------------------------|-------------------|------------------|-------------------|------------------|-------------------|------------------|-------------------|------------------|-------------------|------------------|
| Intercept              | <b>6.89±0.44</b>  | <b>&lt;0.001</b> | <b>5.12±0.53</b>  | <b>&lt;0.001</b> | <b>4.51±0.78</b>  | <b>&lt;0.001</b> | <b>7.18±0.47</b>  | <b>&lt;0.001</b> | <b>3.66±0.84</b>  | <b>&lt;0.001</b> |
| Whites                 | 0                 |                  | 0                 |                  | 0                 |                  | 0                 |                  | 0                 |                  |
| Blacks                 | <b>-1.00±0.31</b> | <b>0.002</b>     | <b>-0.80±0.31</b> | <b>0.010</b>     | -0.62±0.33        | 0.060            | <b>-0.98±0.31</b> | <b>0.002</b>     | -0.53±0.32        | 0.104            |
| Hispanics              | <b>-1.66±0.25</b> | <b>&lt;0.001</b> | <b>-1.15±0.26</b> | <b>&lt;0.001</b> | <b>-1.57±0.25</b> | <b>&lt;0.001</b> | <b>-1.65±0.26</b> | <b>&lt;0.001</b> | <b>-1.25±0.27</b> | <b>&lt;0.001</b> |
| Age < 67               | 0                 |                  | 0                 |                  | 0                 |                  | 0                 |                  | 0                 |                  |
| Age 67-74              | -0.25±0.26        | 0.348            | -0.30±0.26        | 0.240            | -0.15±0.26        | 0.574            | -0.34±0.27        | 0.204            | -0.34±0.26        | 0.192            |
| Age ≥74                | -0.49±0.26        | 0.061            | -0.48±0.26        | 0.062            | -0.11±0.29        | 0.706            | <b>-0.59±0.27</b> | <b>0.028</b>     | -0.38±0.29        | 0.183            |
| Sex                    | 0.03±0.25         | 0.917            | 0.14±0.24         | 0.565            | 0.17±0.25         | 0.504            | 0.01±0.25         | 0.955            | 0.24±0.24         | 0.327            |
| Low SES                | -                 |                  | <b>0</b>          |                  | -                 |                  | -                 |                  | <b>0</b>          |                  |
| Medium SES             | -                 |                  | <b>1.46±0.30</b>  | <b>&lt;0.001</b> | -                 |                  | -                 |                  | <b>1.41±0.33</b>  | <b>&lt;0.001</b> |
| High SES               | -                 |                  | <b>1.88±0.34</b>  | <b>&lt;0.001</b> | -                 |                  | -                 |                  | <b>1.74±0.37</b>  | <b>&lt;0.001</b> |
| Physical functionality | -                 |                  | -                 |                  | <b>0.16±0.04</b>  | <b>&lt;0.001</b> | -                 |                  | <b>0.11±0.05</b>  | <b>0.011</b>     |
| Depression             | -                 |                  | -                 |                  | -                 |                  | -0.04±0.03        | 0.138            | -0.01±0.03        | 0.646            |
| R <sup>2</sup>         | 0.141             |                  | 0.232             |                  | 0.175             |                  | 0.162             |                  | 0.260             |                  |

Notes: Significant relationships are highlighted. All models are adjusted for race and ethnicity, age, and sex.

Table S6. Baron and Kenny mediation analysis (outcome: attention)

| Racial/ethnic and age differences in attention |                                   | C path (total) effect  | A path effect | B path effect | C' path (direct) effect | AB path (indirect) effect (95% CI) | ab/c*                |         |
|------------------------------------------------|-----------------------------------|------------------------|---------------|---------------|-------------------------|------------------------------------|----------------------|---------|
| Racial differences                             | SES influences                    | Hispanic vs White      | -1.65±0.25*** | -0.64±0.08*** | -                       | -1.15±0.27***                      | -0.50 (-0.75; -0.25) | 0.30*** |
|                                                |                                   | Black vs White         | -0.98±0.31**  | -0.30±0.11**  | -                       | -0.71±0.31*                        | -0.27 (-0.49; -0.05) | 0.28*   |
|                                                |                                   | SES                    | -             | -             | 0.86±0.17***            | -                                  | -                    | -       |
| Age differences                                | Physical functionality influences | Hispanic vs White      | -1.65±0.25*** | -0.48±0.33    | -                       | -1.58±0.25***                      | -0.07 (-0.17; 0.03)  | 0.04    |
|                                                |                                   | Black vs White         | -0.98±0.31*** | -2.31±0.41*** | -                       | -0.63±0.33                         | -0.35 (-0.57; -0.13) | 0.36**  |
|                                                |                                   | Physical functionality | -             | -             | 0.15±0.04***            | -                                  | -                    | -       |
|                                                |                                   | Age 67-74 vs <64       | -0.26±0.26    | -0.82±0.37*   | -                       | -0.15±0.26                         | -0.11 (-0.23; 0.01)  | 0.42    |
|                                                |                                   | Age ≥74 vs Age < 64    | -0.50±0.26*   | -2.67±0.38*** | -                       | -0.12±0.29                         | -0.38 (-0.62; -0.14) | 0.76*** |
|                                                | Physical functionality            | -                      | -             | 0.15±0.04***  | -                       | -                                  | -                    |         |

Notes: All models are adjusted for age and sex; c path (total effect)=effect of predictor on outcome; a path=effect of predictor on mediator; b path=effect of mediator on outcome controlling for predictor; c' path (direct effect)=effect of predictor on outcome controlling for mediator; ab path (indirect effect)=effect of predictor on outcome through mediator; Significance of the indirect effect was tested with the Sobel test ; 95% confidence intervals not including 0 indicate a significant; \* Indirect effect as proportion of total effect; highlighted are factors that explain at least 20% of variance in outcomes (e.g. racial disparities in global cognitive performance).

Table S7. Factors contributing to processing speed differences based on race/ethnicity, age, and sex

|                        | Model 1            |                  | Model 2            |                  | Model 3             |                  | Model 4           |                  | Model 5             |                  |
|------------------------|--------------------|------------------|--------------------|------------------|---------------------|------------------|-------------------|------------------|---------------------|------------------|
| Intercept              | <b>47.69±8.35</b>  | <b>&lt;0.001</b> | <b>76.25±9.82</b>  | <b>&lt;0.001</b> | <b>105.24±15.42</b> | <b>&lt;0.001</b> | <b>43.78±8.75</b> | <b>&lt;0.001</b> | <b>120.31±15.83</b> | <b>&lt;0.001</b> |
| Whites                 | 0                  |                  | 0                  |                  | 0                   |                  | 0                 |                  | 0                   |                  |
| Blacks                 | <b>20.05±5.91</b>  | <b>&lt;0.001</b> | <b>15.21±5.68</b>  | <b>0.008</b>     | 8.76±6.24           | 0.162            | <b>19.32±5.88</b> | <b>0.002</b>     | 5.64±5.95           | 0.345            |
| Hispanics              | <b>12.97±74.87</b> | <b>0.010</b>     | 7.15±4.97          | 0.152            | <b>10.81±4.84</b>   | <b>0.027</b>     | <b>11.28±5.03</b> | <b>0.026</b>     | 6.10±4.85           | 0.210            |
| Age < 67               | 0                  |                  | 0                  |                  | 0                   |                  | 0                 |                  | 0                   |                  |
| Age 67-74              | -3.25±5.08         | 0.523            | -1.86±4.78         | 0.698            | -5.43±4.92          | 0.272            | -3.19±5.07        | 0.529            | -3.80±4.67          | 0.416            |
| Age ≥74                | <b>13.24±5.21</b>  | <b>0.012</b>     | <b>13.45±4.92</b>  | <b>0.007</b>     | 3.89±5.46           | 0.477            | <b>13.01±5.21</b> | <b>0.013</b>     | 4.74±5.21           | 0.364            |
| Sex                    | -7.28±4.79         | 0.130            | <b>-8.76±4.52</b>  | <b>0.054</b>     | <b>-8.46±4.62</b>   | <b>0.068</b>     | -7.24±4.76        | 0.129            | <b>-9.84±4.39</b>   | <b>0.026</b>     |
| Low SES                | -                  |                  | <b>0</b>           |                  | -                   |                  | -                 |                  | <b>0</b>            |                  |
| Medium SES             | -                  |                  | <b>-25.74±6.10</b> | <b>&lt;0.001</b> | -                   |                  | -                 |                  | <b>-21.47±6.08</b>  | <b>&lt;0.001</b> |
| High SES               | -                  |                  | <b>-30.15±6.83</b> | <b>&lt;0.001</b> | -                   |                  | -                 |                  | <b>-23.21±6.88</b>  | <b>&lt;0.001</b> |
| Physical functionality | -                  |                  | -                  |                  | <b>-3.99±0.91</b>   | <b>&lt;0.001</b> | -                 |                  | <b>-3.50±0.89</b>   | <b>&lt;0.001</b> |
| Depression             | -                  |                  | -                  |                  | -                   |                  | 0.83±0.57         | 0.158            | 0.31±0.56           | 0.585            |
| R <sup>2</sup>         | 0.100              |                  | 0.175              |                  | 0.175               |                  | 0.111             |                  | 0.236               |                  |

Notes: Significant relationships are highlighted. All models are adjusted for race and ethnicity, age, and sex.

Table S8. Barron and Kenny mediation analysis (outcome: processing speed)

| Racial/ethnic and age differences in <b>TMA</b> |                                   |                        | C path (total) effect | A path effect | B path effect | C' path (direct) effect | AB path (indirect) effect (95% CI) | ab/c <sup>§</sup> |
|-------------------------------------------------|-----------------------------------|------------------------|-----------------------|---------------|---------------|-------------------------|------------------------------------|-------------------|
| Racial differences                              | SES influences                    | Hispanic vs White      | 12.70±4.98*           | -0.64±0.08*** | -             | 6.44±5.03               | 6.26 (1.61; 10.91)                 | 0.49***           |
|                                                 |                                   | Black vs White         | 19.16±5.92**          | -0.30±0.11**  | -             | 13.77±5.76*             | 5.39 (2.06; 8.72)                  | 0.28*             |
|                                                 |                                   | SES                    | -                     | -             | 12.49±3.35*** | -                       | -                                  | -                 |
|                                                 | Physical functionality influences | Hispanic vs White      | 12.70±4.98*           | -0.48±0.33    | -             | 10.68±4.84*             | 2.02 (-0.67; 4.71)                 | 0.16              |
|                                                 |                                   | Black vs White         | 19.16±5.92**          | -2.31±0.41*** | -             | 8.69±6.23               | 10.5 (5.23; 15.77)                 | 0.55***           |
|                                                 |                                   | Physical functionality | -                     | -             | -3.93±0.93*** | -                       | -                                  | -                 |
| Age differences                                 | Physical functionality influences | Age 67-74 vs <64       | -3.19±5.14            | -0.82±0.37*   | -             | -5.54±4.91              | 2.35 (-0.98; 5.68)                 | 0.74              |
|                                                 |                                   | Age ≥74 vs Age < 64    | 14.59±5.26**          | -2.67±0.38*** | -             | 3.62±5.43               | 10.97 (5.60; 16.34)                | 0.75***           |
|                                                 |                                   | Physical functionality | -                     | -             | -4.22±0.83*** | -                       | -                                  | -                 |

Notes: All models are adjusted for race and ethnicity, age, and sex; c path (total effect)=effect of predictor on outcome; a path=effect of predictor on mediator; b path=effect of mediator on outcome controlling for predictor; c' path (direct effect)=effect of predictor on outcome controlling for mediator; ab path (indirect effect)=effect of predictor on outcome through mediator; Significance of the indirect effect was tested with the Sobel test ; 95% confidence intervals not including 0 indicate a significant; <sup>§</sup> Indirect effect as proportion of total effect; highlighted are factors that explain at least 20% of variance in outcomes (e.g. racial disparities in global cognitive performance).



Table S9. Factors contributing to semantic verbal fluency differences based on race/ethnicity, age, and sex

|                        | Model 1           |                  | Model 2           |                  | Model 3            |                  | Model 4           |                  | Model 5           |                  |
|------------------------|-------------------|------------------|-------------------|------------------|--------------------|------------------|-------------------|------------------|-------------------|------------------|
| Intercept              | <b>18.48±1.49</b> | <b>&lt;0.001</b> | <b>16.13±1.84</b> | <b>&lt;0.001</b> | <b>10..29±2.53</b> | <b>&lt;0.001</b> | <b>19.84±1.57</b> | <b>&lt;0.001</b> | <b>10.66±2.82</b> | <b>&lt;0.001</b> |
| Whites                 | 0                 |                  | 0                 |                  | 0                  |                  | 0                 |                  | 0                 |                  |
| Blacks                 | <b>-3.40±1.07</b> | <b>0.002</b>     | <b>-2.95±1.08</b> | <b>0.007</b>     | -2.03±1.10         | 0.067            | -                 | <b>0.001</b>     | -1.84±1.13        | 0.103            |
|                        |                   |                  |                   |                  |                    |                  | <b>3.48±1.056</b> |                  |                   |                  |
| Hispanics              | <b>-3.62±0.88</b> | <b>&lt;0.001</b> | <b>-2.84±0.94</b> | <b>0.003</b>     | <b>-3.40±0.88</b>  | <b>&lt;0.001</b> | <b>-3.42±0.88</b> | <b>&lt;0.001</b> | <b>-2.85±0.93</b> | <b>0.002</b>     |
| Age < 67               | 0                 |                  | 0                 |                  | 0                  |                  | 0                 |                  | 0                 |                  |
| Age 67-74              | <b>-2.23±0.91</b> | <b>0.015</b>     | <b>-2.29±0.91</b> | <b>0.012</b>     | <b>-1.91±0.89</b>  | <b>0.033</b>     | <b>-2.15±0.90</b> | <b>0.017</b>     | <b>-1.94±0.90</b> | <b>0.032</b>     |
| Age ≥74                | <b>-4.26±0.89</b> | <b>&lt;0.001</b> | <b>-4.19±0.90</b> | <b>&lt;0.001</b> | <b>-2.72±0.96</b>  | <b>0.005</b>     | <b>-4.14±0.88</b> | <b>&lt;0.001</b> | <b>-2.72±0.98</b> | <b>0.006</b>     |
| Sex                    | 1.50±0.83         | 0.072            | 1.62±0.84         | 0.054            | <b>1.73±0.83</b>   | <b>0.039</b>     | 1.41±0.82         | 0.088            | <b>1.72±0.84</b>  | <b>0.042</b>     |
| Low SES                | -                 |                  | <b>0</b>          |                  | -                  |                  | -                 |                  | <b>0</b>          |                  |
| Medium SES             | -                 |                  | 1.58±1.05         | 0.132            | -                  |                  | -                 |                  | 0.91±1.08         | 0.401            |
| High SES               | -                 |                  | <b>3.05±1.22</b>  | <b>0.013</b>     | -                  |                  | -                 |                  | 1.83±1.26         | 0.147            |
| Physical functionality | -                 |                  | -                 |                  | <b>0.59±0.14</b>   | <b>&lt;0.001</b> | -                 |                  | <b>0.51±0.15</b>  | <b>&lt;0.001</b> |
| Depression             | -                 |                  | -                 |                  | -                  |                  | <b>-0.23±0.09</b> | <b>0.013</b>     | -0.14±0.10        | 0.160            |
| R <sup>2</sup>         | 0.137             |                  | 0.152             |                  | 0.186              |                  | 0.159             |                  | 0.198             |                  |

Notes: Significant relationships are highlighted. All models are adjusted for race and ethnicity, age, and sex.

Table S10. Barron and Kenny mediation analysis (outcome: semantic verbal fluency)

| Racial/ethnic and age differences in <b>semantic verbal fluency</b> |                                   |                        | C path (total) effect | A path effect | B path effect | C' path (direct) effect | AB path (indirect) effect (95% CI) | ab/c <sup>‡</sup> |
|---------------------------------------------------------------------|-----------------------------------|------------------------|-----------------------|---------------|---------------|-------------------------|------------------------------------|-------------------|
| Racial differences                                                  | SES influences                    | Hispanic vs White      | -3.49±0.87***         | -0.64±0.08*** | -             | -2.77±0.93**            | -0.72 (-1.50; 0.06)                | 0.21              |
|                                                                     |                                   | Black vs White         | -3.16±1.06**          | -0.30±0.11**  | -             | -2.77±1.07*             | -0.39 (-0.86; 0.08)                | 0.12              |
|                                                                     |                                   | SES                    | -                     | -             | 1.41±0.60*    | -                       | -                                  | -                 |
|                                                                     | Physical functionality influences | Hispanic vs White      | -3.49±0.87***         | -0.48±0.33    | -             | -3.38±0.87***           | -0.11 (-0.50; 0.28)                | 0.03              |
|                                                                     |                                   | Black vs White         | -3.16±1.06**          | -2.31±0.41*** | -             | -1.97±1.10              | -1.19 (-1.99; -0.39)               | 0.38**            |
|                                                                     |                                   | Physical functionality | -                     | -             | 0.55±0.15***  | -                       | -                                  | -                 |
| Age differences                                                     | Physical functionality influences | Age 67-74 vs <64       | -2.27±0.91*           | -0.82±0.37*   | -             | -1.90±0.89*             | -0.37 (-0.86; 0.12)                | 0.16              |
|                                                                     |                                   | Age ≥74 vs Age < 64    | -4.36±0.89***         | -2.67±0.38*** | -             | -2.70±0.95**            | -1.66 (-2.52; -0.80)               | 0.38***           |
|                                                                     |                                   | Physical functionality | -                     | -             | 0.60±0.14***  | -                       | -                                  | -                 |

Notes: All models are adjusted for race and ethnicity, age, and sex; c path (total effect)=effect of predictor on outcome; a path=effect of predictor on mediator; b path=effect of mediator on outcome controlling for predictor; c' path (direct effect)=effect of predictor on outcome controlling for mediator; ab path (indirect effect)=effect of predictor on outcome through mediator; Significance of the indirect effect was tested with the Sobel test ; 95% confidence intervals not including 0 indicate a significant; <sup>‡</sup> Indirect effect as proportion of total effect; highlighted are factors that explain at least 20% of variance in outcomes (e.g. racial disparities in global cognitive performance).
